# Supplementary material for: A pipeline for copy number profiling of single circulating tumour cells to assess intrapatient tumour heterogeneity
Source: PubMed Central journal article supplement (PMC9394233; doi:10.1002/1878-0261.13174), 2022-07-08

Single MCF-7, QC-7, sample 11

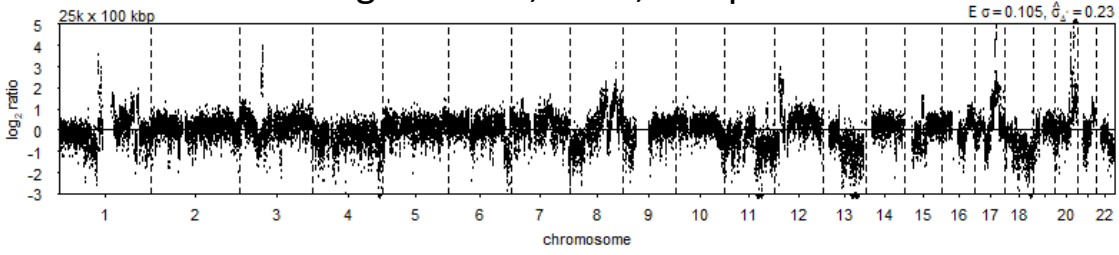

Single MCF-7, QC-7, sample 12

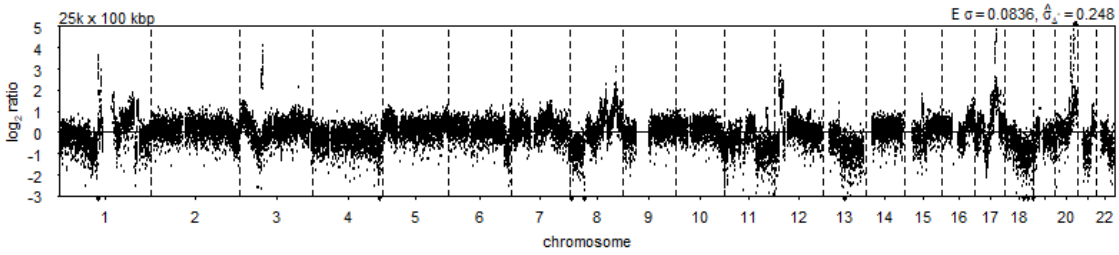

Single MCF-7, QC-7, sample 13

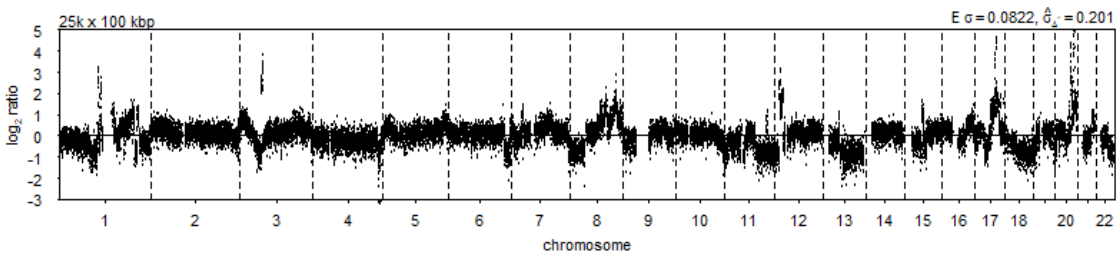

Single MCF-7, QC-6, sample 19

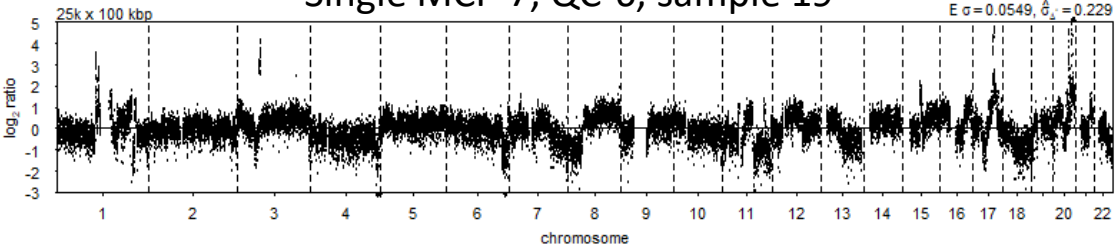

Single MCF-7, QC-5, sample 20

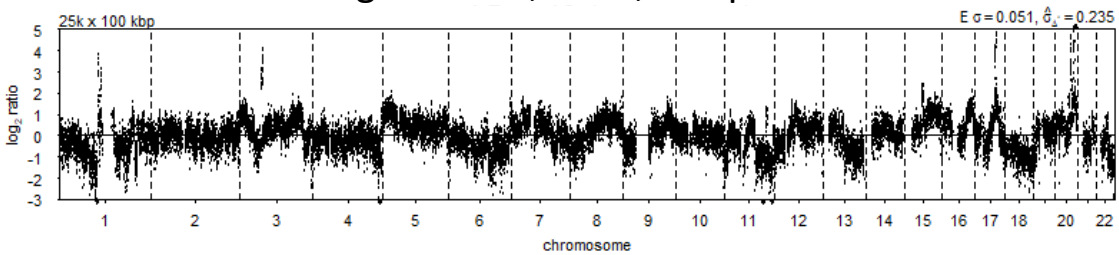

Supplement: MOL2-16-2981-s005.pdf [file MOL2-16-2981-s005.pdf]
