# Supplementary material for: A pipeline for copy number profiling of single circulating tumour cells to assess intrapatient tumour heterogeneity
Source: PubMed Central journal article supplement (PMC9394233; doi:10.1002/1878-0261.13174), 2022-07-08

Densityplot of sequence-read distribution mFAST-SeqS on single cell WGA

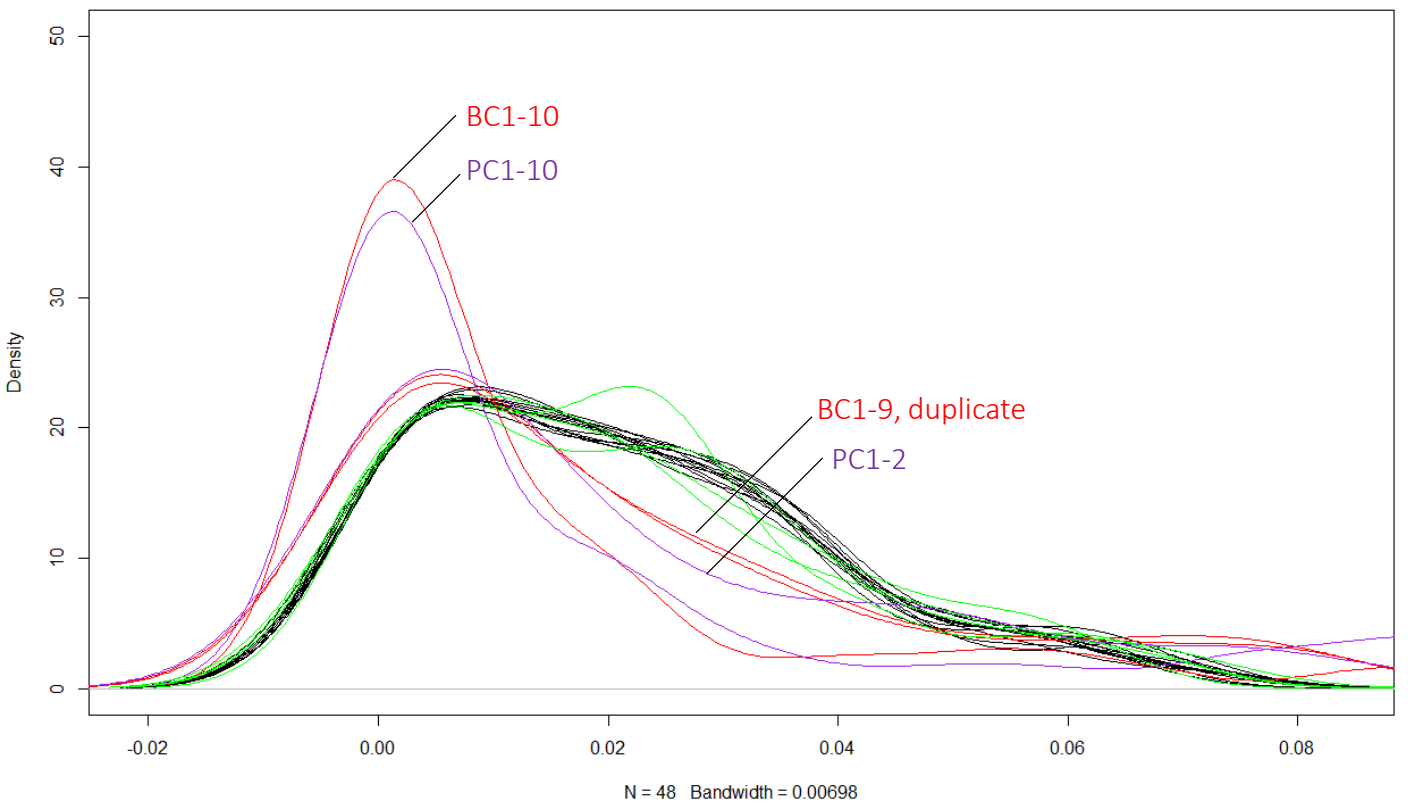

Supplement: MOL2-16-2981-s010.pdf [file MOL2-16-2981-s010.pdf]
